# Supplementary material for: Viral DNA Replication Orientation and hnRNPs Regulate Transcription of the Human Papillomavirus 18 Late Promoter
Source: mBio. 2017 May 30;8(3):e00713-17. doi: 10.1128/mBio.00713-17 (PMC5449659; doi:10.1128/mBio.00713-17)
Supplement: FIG S2 [file mbo003173324sf2.pdf]

7805  
 .....CTGTGCATACATAGTTTATGCAACCGAAATAGGTGGGCAGCACATACTATACTTTTC/ATTAATACTTTTAACAATTGTAG  
 E2BS3  
 7857/1  
 TATAAAAAAGGGAGTAACCGAAACGGTCGGGACCGAAACGGTGTATATAAAAGATGTGAGAAACACACCACAATGACT  
 E2BS2  
 P55  
 E2BS1  
 P102  
 105  
 ATGGCGCGCTTTGAGGATCC.....

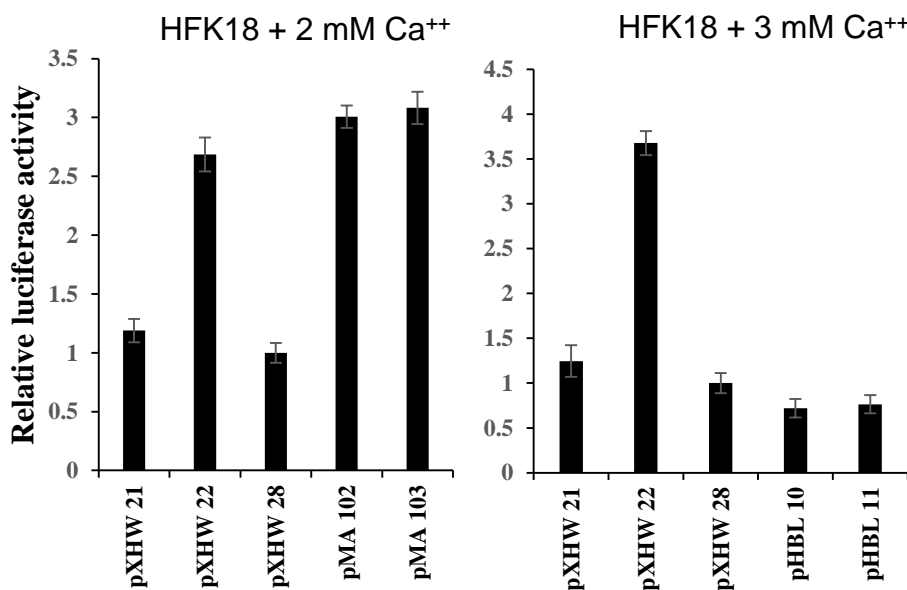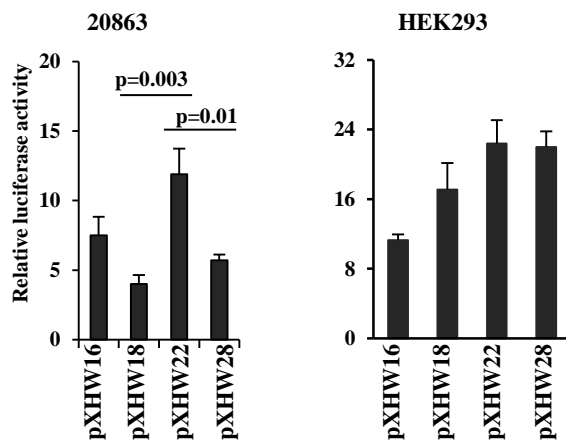

**Fig S2**
