# Supplementary material for: Viral DNA Replication Orientation and hnRNPs Regulate Transcription of the Human Papillomavirus 18 Late Promoter
Source: PubMed Central journal article supplement (PMC5449659; doi:10.1128/mbio.00713-17), 2017-05-30
Supplement: mbo003173324sf4.pdf [file mbo003173324sf4.pdf]

**A**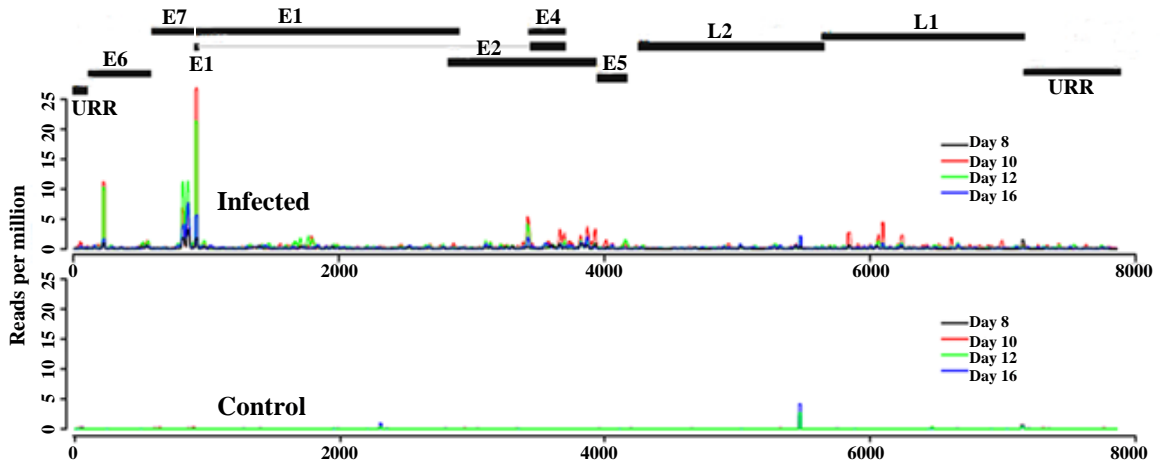**B**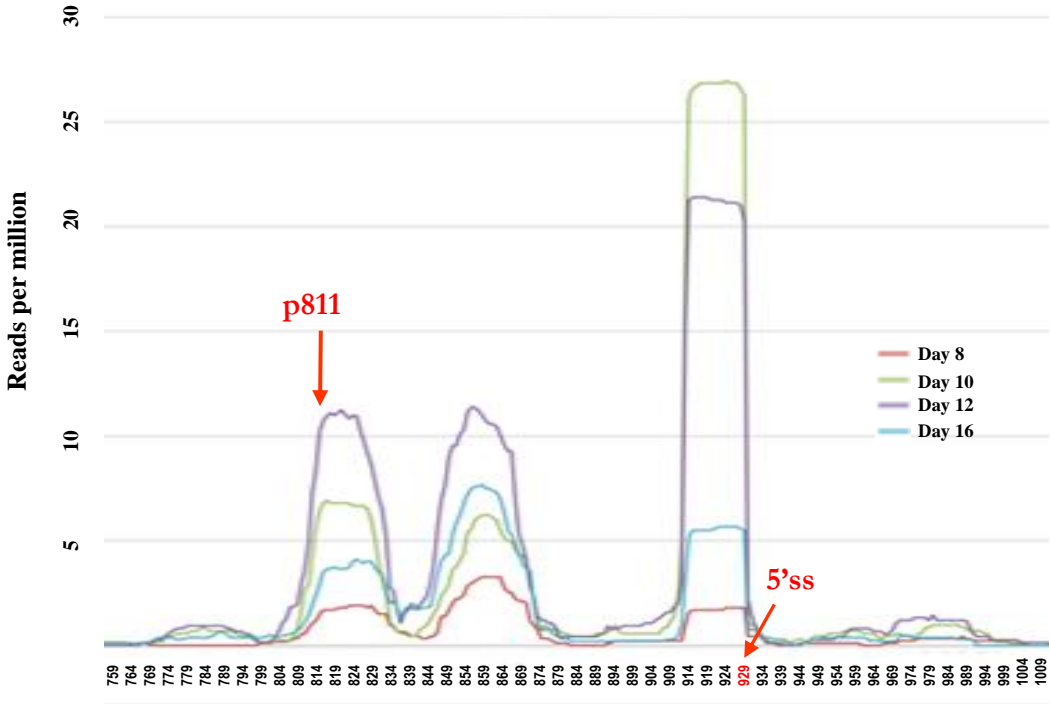**Fig S4**
