# Supplementary material for: Viral DNA Replication Orientation and hnRNPs Regulate Transcription of the Human Papillomavirus 18 Late Promoter
Source: PubMed Central journal article supplement (PMC5449659; doi:10.1128/mbio.00713-17), 2017-05-30
Supplement: mbo003173324st1.pdf [file mbo003173324st1.pdf]

**Table S1. Peptides identified by LC-MS/MS analysis**

| <b>Band # 1</b> |              |                |                                                                                                                                                                                                                                                                  |                           |                    |
|-----------------|--------------|----------------|------------------------------------------------------------------------------------------------------------------------------------------------------------------------------------------------------------------------------------------------------------------|---------------------------|--------------------|
| Hits            | Protein Mass | No. of Peptide | Sequence Header                                                                                                                                                                                                                                                  | gi number                 | Relative Abundance |
| 1               | 32119.84     | 30             | >gi 2773158 gb AAB96683.1  <b>heterogeneous nuclear ribonucleoprotein D0B [Homo sapiens]</b>                                                                                                                                                                     | <a href="#">2773158</a>   | 79.8%              |
| 2               | 28206.8      | 10             | >gi 31455403 emb CAD92458.1  aprataxin [Homo sapiens]                                                                                                                                                                                                            | <a href="#">31455403</a>  | 13.0%              |
| 3               | 36059.25     | 6              | >gi 55956919 ref NP_112556.2  <b>heterogeneous nuclear ribonucleoprotein A/B isoform a</b> [Homo sapiens]gi 21757498 dbj BAC05134.1  unnamed protein product [Homo sapiens]gi 33874222 gb AAH36708.1  Heterogeneous nuclear ribonucleoprotein A/B [Homo sapiens] | <a href="#">55956919</a>  | 6.4%               |
| 4               | 39010.31     | 2              | >gi 4689144 gb AAD27781.1 AF077048_1 single strand DNA-binding protein [Homo sapiens]                                                                                                                                                                            | <a href="#">4689144</a>   | 0.6%               |
| 5               | 38547.67     | 2              | >gi 7689385 gb AAF67759.1 AF255675_1 homeoprotein C10 [Homo sapiens]                                                                                                                                                                                             | <a href="#">7689385</a>   | 0.1%               |
| <b>Band # 2</b> |              |                |                                                                                                                                                                                                                                                                  |                           |                    |
| Hits            | Protein Mass | No. of Peptide | Sequence Header                                                                                                                                                                                                                                                  | gi number                 | Relative Abundance |
| 1               | 31689.75     | 38             | >gi 433344 gb AAC50056.1  p37 AUF1 [Homo sapiens]                                                                                                                                                                                                                | <a href="#">433344</a>    | 70.5%              |
| 2               | 38432.87     | 26             | >gi 190156 gb AAA60133.1  <b>beta-polymerase [Homo sapiens]</b>                                                                                                                                                                                                  | <a href="#">190156</a>    | 10.7%              |
| 3               | 36059.25     | 12             | >gi 55956919 ref NP_112556.2  <b>heterogeneous nuclear ribonucleoprotein A/B isoform a</b> [Homo sapiens]gi 21757498 dbj BAC05134.1  unnamed protein product [Homo sapiens]gi 33874222 gb AAH36708.1  Heterogeneous nuclear ribonucleoprotein A/B [Homo sapiens] | <a href="#">55956919</a>  | 8.8%               |
| 4               | 39616.3      | 8              | >gi 197692437 dbj BAG70182.1  replication factor C 2 isoform 1 [Homo sapiens]                                                                                                                                                                                    | <a href="#">197692437</a> | 1.8%               |
| 5               | 37795.32     | 8              | >gi 119596217 gb EAW75811.1  deoxynucleotidyltransferase, terminal, interacting protein 1, isoform CRA_b [Homo sapiens]                                                                                                                                          | <a href="#">119596217</a> | 2.8%               |
| 6               | 32430.95     | 8              | >gi 14249959 gb AAH08364.1  Heterogeneous nuclear ribonucleoprotein C (C1/C2) [Homo sapiens]                                                                                                                                                                     | <a href="#">14249959</a>  | 3.3%               |
| 7               | 41258.14     | 4              | >gi 62896703 dbj BAD96292.1  replication factor C 3 isoform 1 variant [Homo sapiens]                                                                                                                                                                             | <a href="#">62896703</a>  | 0.5%               |
| 8               | 32687.66     | 4              | >gi 49660012 gb AAT68294.1  sarcomeric tropomyosin kappa [Homo sapiens]                                                                                                                                                                                          | <a href="#">49660012</a>  | 0.3%               |
| 9               | 33996.15     | 2              | >gi 119598577 gb EAW78171.1  replication factor C (activator 1) 4, 37kDa, isoform CRA_b [Homo sapiens]gi 194386378 dbj BAG59753.1  unnamed protein product [Homo sapiens]                                                                                        | <a href="#">119598577</a> | 1.3%               |
